# Supplementary material
Source: PubMed Central journal article supplement (PMC5025677)
Supplement: 10.1074_M116.736850_jbc.M116.736850-1.pdf [file 10.1074_M116.736850_jbc.M116.736850-1.pdf]

## Supplemental Information

### **The lipidated peptidomimetic F2M2, Lau-[(S)-Aoc]-(Lys-βNphe)<sub>6</sub>-NH<sub>2</sub>, is a potent cross-species FPR2 agonist activating human and murine neutrophil NADPH-oxidase**

André Holdfeldt<sup>a</sup>, Sarah Line Skovbakke<sup>b</sup>, Malene Winther<sup>a</sup>, Michael Gabl<sup>a</sup>, Christina Nielsen<sup>b</sup>, Iris Perez-Gassol<sup>b</sup> and Camilla Josephine Larsen<sup>b</sup>, Ji Ming Wang<sup>c</sup>, Anna Karlsson<sup>a</sup>, Claes Dahlgren<sup>a</sup>, Huamei Forsman<sup>a,1</sup>, Henrik Franzyk<sup>b</sup>

From the <sup>a</sup>Department of Rheumatology and Inflammation Research, Institute of Medicine, Sahlgrenska Academy, University of Gothenburg, Guldhedsgatan 10A, 413 46 Gothenburg, Sweden, the <sup>b</sup>Department of Drug Design and Pharmacology, Faculty of Health and Medical Sciences, University of Copenhagen, Universitetsparken 2, DK-2100 Copenhagen, Denmark, and the <sup>c</sup>Laboratory of Molecular Immunoregulation, Cancer and Inflammation Program, Frederick National Cancer Institute, Bethesda, Maryland, USA

## Materials and general procedures for compound characterization (HPLC and MS)

Solvents, Rink amide resin, Fmoc-Lys(Boc)-OH, Fmoc-Phe-OH and Fmoc-Aoc-OH and coupling reagents were obtained from IrisBiotech (Marktredwitz, Germany), while octanoic acid, Lau-OSu and Pam-OSu, octanoic acid, decanoic acid, and myristic acid were obtained from Sigma-Aldrich Chemie (Steinheim, Germany). Analytical UHPLC was performed on a Shimadzu Prominence UHPLC system using a Phenomenex Luna C18(2) HTS column (100 × 3.0 mm; particle size: 2.5 μm) eluted at a rate of 0.5 mL/min. Analytical HPLC was performed on a Shimadzu HPLC system with diode array detector (DAD) consisting of an SCL-10A VP controller, an SIL-10AD VP auto injector, an LC-10AT VP Pump, an SPDM10A VP DAD, and a CTO-10AC VP column oven, using a Phenomenex Luna C18(2) column (150 × 4.6 mm; particle size: 3 μm) eluted at a rate of 0.8 mL/min. In both cases injection volumes were 5-10 μL of a ~1 mg/mL solution, and separations were performed at 40 °C. Eluents A (H<sub>2</sub>O/MeCN/TFA) 95:5:0.1) and B (MeCN/H<sub>2</sub>O/TFA 95:5:0.1) were employed for linear gradient elution (20% B → 100% B during 30 min). Preparative HPLC separations were performed on a Phenomenex Luna C18 (2) column (250 × 21.2 mm; particle size: 5 μm) by using an Agilent 1100 system consisting of two preparative-scale pumps, an autosampler, and a multiple-wavelength UV detector. The eluents A and B were employed with a flow rate of 20 mL/min; injection volumes were 300-900 μL; typically, a linear gradient of 20% B → 80% B during 20 min was employed. High-resolution mass spectra were obtained on a Bruker MicroTOF-Q LC mass spectrometer equipped with an electrospray ionization source and a Quadrupole MS detector. The analyses were performed as ESI-MS (m/z): [M + nH]<sup>n+</sup> for all peptidomimetics.

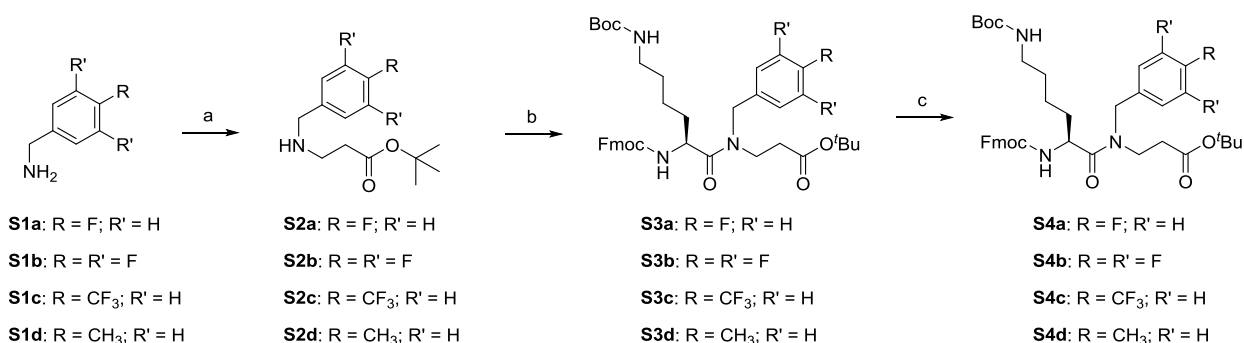

*Scheme S1. Synthesis of dimeric building blocks. Reagents and conditions: (a) tert-butyl acrylate (0.4 equiv.), 50°C, MeOH, 6 h; (b)*

*General procedure for the Michael adducts:*

To a solution of *tert*-butyl acrylate (25-80 mmol scale) in MeOH (2.5 ml/mmol) in a round-bottomed flask (250 mL) equipped with a condenser was added the appropriate substituted benzylamine (2.5 equiv). The mixture was heated to 50°C (in a silicone oil bath) while stirring for 6 h. The reaction mixture was concentrated and the residue dissolved in DCM (15-40 mL). The solution was loaded onto a VLC column (10 × 10 cm or 8 × 8 cm; packed with silica gel 60H from Merck) pre-treated with heptane. Gradient elution with heptane, heptane–DCM 1:1, DCM and DCM–MeOH 500:1. The fractions containing the Michael adduct were concentrated and dried further on a vacuum line (oil-pump) for 16 h.

Michael adduct **S1a** (4.92 g slightly impure, 24%; 13.27 g, 65%) was prepared as above from 80 mmol *t*-Bu acrylate.

<sup>1</sup>H NMR (400 MHz), CD<sub>3</sub>OD): δ = 1.44 (s, 9 H), 2.45 (t, *J* = 6.9 Hz, 2 H), 2.78 (t, *J* = 6.9 Hz, 2 H), 3.72 (s, 2 H), 7.04 (br t, *J* = 8.8 Hz, 2 H), 7.34 (dd, *J* = 8.8 and 5.5 Hz, 2 H). <sup>13</sup>C NMR (100 Mz, CD<sub>3</sub>OD): δ = 28.3, 36.1, 45.2, 53.5, 81.8, 116.1 (d, <sup>2</sup>*J*<sub>CF</sub> = 21.4 Hz), 131.3 (d, <sup>3</sup>*J*<sub>CF</sub> = 8.0 Hz), 136.6 (d, <sup>4</sup>*J*<sub>CF</sub> = 3.3 Hz), 163.5 (d, <sup>1</sup>*J*<sub>CF</sub> = 243.7 Hz), 173.5.

Michael adduct **S1b** (4.86 g, 67%) was prepared as above from 25 mmol *t*-Bu acrylate.

<sup>1</sup>H NMR (400 MHz), CD<sub>3</sub>OD): δ = 1.45 (s, 9 H), 2.44 (t, *J* = 6.8 Hz, 2 H), 2.77 (t, *J* = 6.8 Hz, 2 H), 3.73 (s, 2 H), 7.13 (m, 2 H). <sup>13</sup>C NMR (100 Mz, CD<sub>3</sub>OD): δ = 28.3, 36.3, 45.2, 53.0, 81.9, 113.3 (dd, <sup>2</sup>*J*<sub>CF</sub> = 17.0 Hz and <sup>3</sup>*J*<sub>CF</sub> = 4.1 Hz), 138.4 (m), 139.8 (dt, <sup>1</sup>*J*<sub>CF</sub> = 248.4 Hz and <sup>2</sup>*J*<sub>CF</sub> = 2 × 15.5 Hz), 152.4 (ddd, <sup>1</sup>*J*<sub>CF</sub> = 247.7 Hz, <sup>2</sup>*J*<sub>CF</sub> = 9.9 Hz, and <sup>3</sup>*J*<sub>CF</sub> = 3.4 Hz), 173.6.

Michael adduct **S1c** (8.82 g, 46%) was prepared as above from 63 mmol *t*-Bu acrylate.

<sup>1</sup>H NMR (400 MHz), CD<sub>3</sub>OD): δ = 1.44 (s, 9 H), 2.46 (t, *J* = 6.8 Hz, 2 H), 2.81 (t, *J* = 6.8 Hz, 2 H), 3.84 (s, 2 H), 7.53 (d, *J* = 8.0 Hz, 2 H), 7.62 (d, *J* = 8.0 Hz, 2 H). <sup>13</sup>C NMR (100 Mz, CD<sub>3</sub>OD): δ = 28.3, 36.2, 45.4, 53.7, 81.9, 125.8 (q, <sup>1</sup>*J*<sub>CF</sub> = 271.1 Hz), 126.3 (q, <sup>3</sup>*J*<sub>CF</sub> = 3.9 Hz), 129.9, 130.4 (q, <sup>2</sup>*J*<sub>CF</sub> = 32.1 Hz), 145.4, 173.5.

Michael adduct **S1d** (2.65 g slightly impure, 13%; 12.69 g, 63%) was prepared as above from 80 mmol *t*-Bu acrylate.

<sup>1</sup>H NMR (400 MHz), CD<sub>3</sub>OD): δ = 1.43 (s, 9 H), 2.30 (s, 3 H), 2.44 (t, *J* = 6.9 Hz, 2 H), 2.77 (t, *J* = 6.9 Hz, 2 H), 3.68 (s, 2 H), 7.13 (d, *J* = 8.0 Hz, 2 H), 7.19 (d, *J* = 8.0 Hz, 2 H). <sup>13</sup>C NMR (100 Mz, CD<sub>3</sub>OD): δ = 21.2, 28.3, 36.0, 45.2, 54.0, 81.8, 129.4, 130.1, 137.4, 139.9, 173.5.

*General procedure for dimeric building blocks:*

In a round-bottomed flask Fmoc-Lys(Boc)-OH (1.1 equiv) was dissolved in DCM (30 mL/g), and then TBTU (1.5 equiv) and DIPEA (2.5 equiv) were added, and the resulting mixture was stirred for 10 min. The Michael adduct was added (17-48 mmol scale; 1 equiv) in DCM (10-20 mL), and then the mixture was stirred for 16 h at room temperature. The reaction mixture was concentrated to ¼ of the volume, diluted with EtOAc (500-1000 mL) and then extracted successively with 1M HCl 1M (250-500 mL, 3×), water (250-500 mL), 0.1M NaOH (250-500 mL, 2×), satd NaHCO<sub>3</sub> (250-500 mL), water (250-500 mL), brine (250-500 mL), and finally the organic phase was dried with Na<sub>2</sub>SO<sub>4</sub> and then concentrated *in vacuo*. The residue was dissolved in DCM (25-50 mL) and loaded onto a VLC column (8 × 8 cm or 10 × 12 cm; Silica gel 60 from Merck: 15-40 µm) pre-treated with heptane. Gradient elution: heptane followed by heptane–EtOAc 5:1 to 2.5:1. Fractions containing the intermediate *tert*-butyl ester were concentrated and dried on a vacuum line (oil-pump) overnight. An aliquot of this intermediate (12-23 mmol) was treated with TFA–DCM 1:3 (80-160 mL) for 2 h. The mixture was repeatedly co-concentrated with toluene (50 mL, 3×) and then dried on a vacuum line for 1 h. The residue was dissolved in DCM (10 mL/mmol) and then DIPEA (5 equiv) was added (to pH > 8). Then Boc<sub>2</sub>O (1.5 equiv) in DCM (2.5 mL/mmol) was added. The mixture was stirred for 16 h. The reaction mixture was concentrated to ¼ volume and was then loaded onto a VLC column (10 × 8 cm, 10 × 9, or 10 × 12 cm; Silica gel 60 from Merck: 15-40 µm) pretreated with heptane. Gradient elution: heptane followed by heptane–EtOAc mixtures (3:1 to 1:1.5) containing 0.1% AcOH. Fractions containing the building blocks were repeatedly co-concentrated with toluene and dried for 16 h on a vacuum line (oil-pump).

Starting from **S2a** (12.27 g; 48.4 mmol) the ester intermediate **S3a** (29.91 g; 88%) was obtained, and an aliquot of this (16.09 g; 22.9 mmol) was converted into Fmoc-Lys(Boc)-βNFphe-OH (**S4a**; 10.88 g, 73%).  
Analyt. UHPLC:  $t_R = 5.45$  min (50% → 100% B in 10 min; purity: >99.9%).

<sup>1</sup>H NMR (600 MHz, CD<sub>3</sub>OD): δ = 1.21-1.56 (m, 4 H), 1.40\* (s, 9H), 1.41 (s, 9 H), 1.63\* (m, 2 H), 1.70 (m, 2 H), 2.48 (m, 1 H), 2.57-2.66 (m, 1H), 2.72\* (m, 1 H), 2.91-3.08 (m, 2 H), 3.44\* (m, 1 H), 3.58-3.75 (m, 2 H), 4.18\* (t,  $J = 7.0$  Hz, 1H), 4.21 (t,  $J = 6.8$  Hz, 1H), 4.29-4.42 (m, 2 H), 4.52-4.65 (m, 3H), 4.78\* (d,  $J = 16.8$  Hz, 1 H), 7.00 (t,  $J = 8.7$  Hz, 1 H), 7.06 (t, 8.7 Hz, 1 H), 7.29-7.35 (m, 4 H), 7.36-7.40 (m, 2 H), 7.63-7.68 (m, 2 H), 7.79 (d,  $J = 7.6$  Hz, 2 H).

<sup>13</sup>C NMR (150 Mz, CD<sub>3</sub>OD): δ = 24.0, 24.1\*, 28.8, 30.6, 32.8, 32.9, 34.3\*, 41.0, 40.9\*, 44.0\*, 44.1, 48.4, 49.1<sup>#</sup>, 52.0, 52.5, 52.7\*, 67.9, 79.9, 116.6\* (d,  $^2J_{CF} = 21.8$  Hz), 116.3 (d,  $^2J_{CF} = 21.8$  Hz), 120.9, 126.2, 128.2\*\*, 128.8, 130.7 (d,  $^3J_{CF} = 8.1$  Hz), 130.2\* (d,  $^3J_{CF} = 8.0$  Hz), 134.6 (d,  $^4J_{CF} = 2.9$  Hz), 134.1\* (d,  $^4J_{CF} = 2.1$  Hz), 142.6, 145.2\*, 145.3, 158.3, 158.4, 163.7\* ( $J = 244.8$  Hz), 163.6 ( $J = 244.3$  Hz), 174.6\*, 174.8, 175.2, 175.0\*.

Starting from **S2b** (4.86 g; 16.8 mmol) the ester intermediate **S3b** (9.48 g; 76%) was obtained, and an aliquot of this (9.00 g; 12.2 mmol) was converted into Fmoc-Lys(Boc)- $\beta$ NF<sub>3</sub>phe-OH (**S4b**; 5.36 g; 64%). Analyt. UHPLC:  $t_R$  = 6.03 min (50%  $\rightarrow$  100% B in 10 min; purity: 99.5%).

<sup>1</sup>H NMR (600 MHz), CD<sub>3</sub>OD):  $\delta$  = 1.26-1.54 (m, 4 H), 1.40\* (s, 9H), 1.41 (s, 9 H), 1.58-1.73 (m, 2 H), 2.51\* (m, 1 H), 2.59-2.68 (m, 1 H), 2.73 (m, 1 H), 2.94-3.09 (m, 2 H), 3.36\* (m, 1 H), 3.62 (m, 1H), 3.70\* (m, 1 H), 3.83 (m, 1 H), 4.15\* (t,  $J$  = 6.6 Hz, 1 H), 4.20 (t,  $J$  = 6.8 Hz, 1H), 4.39-4.46 (m, 2 H), 4.49\* (d,  $J$  = 15.5 Hz, 1H), 4.58-4.64 (m, 3H), 4.80 (d,  $J$  = 17.5 Hz, 1H), 7.00 (m, 1 H) 7.08-7.15 (m, 2 H), 7.20 (t,  $J$  = 7.5 Hz, 1 H), 7.26-7.31 (m, 2 H), 7.34-7.38 (m, 2 H), 7.61-7.67 (m, 2 H) 7.77 (d,  $J$  = 7.5 Hz, 2 H).

<sup>13</sup>C NMR (150 Mz, CD<sub>3</sub>OD):  $\delta$  = 23.9\*, 24.1, 28.8, 30.6, 32.6, 32.9\*, 34.4, 40.9\*, 41.0, 44.1\*, 44.8, 48.4, 49.4, 51.6\*, 52.5, 52.8\*, 67.9\*\*, 79.9, 112.5\* (dd,  $^2J_{CF}$  = 17.4 Hz and  $^3J_{CF}$  = 3.5 Hz), 112.8 (dd,  $^2J_{CF}$  = 17.6 Hz and  $^3J_{CF}$  = 4.2 Hz), 120.9, 126.1, 126.3\*, 128.7, 128.1\*, 128.2, 135.6\* (m), 136.0 (m), 139.9 (dt,  $^1J_{CF}$  = 249.0 Hz and  $^2J_{CF}$  = 2  $\times$  15.4 Hz), 140.1\* (dt,  $^1J_{CF}$  = 249.6 Hz and  $^2J_{CF}$  = 2  $\times$  15.4 Hz), 142.6, 145.3, 145.0\*, 145.1, 152.4 (ddd,  $^1J_{CF}$  = 248.6 Hz,  $^2J_{CF}$  = 9.8 Hz, and  $^3J_{CF}$  = 3.2 Hz), 152.6\* (ddd,  $^1J_{CF}$  = 249.6 Hz,  $^2J_{CF}$  = 9.7 Hz, and  $^3J_{CF}$  = 2.8 Hz), 158.4\*, 158.5, 158.6, 174.5, 174.9\*, 175.2, 175.4\*.

Starting from **S2c** (8.82 g; 29.1 mmol) the ester intermediate **S3c** (17.01 g; 78%) was obtained, and an aliquot of this (12.56 g; 16.7 mmol) was converted into Fmoc-Lys(Boc)- $\beta$ NCF<sub>3</sub>phe-OH (**S4c**; 4.28 g; 37%). Analyt. UHPLC:  $t_R$  = 6.29 min (50%  $\rightarrow$  100% B in 10 min; purity: >99.9%).

<sup>1</sup>H NMR (600 MHz), CD<sub>3</sub>OD):  $\delta$  = 1.21-1.58 (m, 4 H), 1.40\* (s, 9H), 1.41 (s, 9 H), 1.64\* (m, 2 H), 1.73 (m, 2 H), 2.52\* (m, 1 H), 2.61-2.69 (m, 1 H), 2.73 (m, 1 H), 2.92-3.09 (m, 2 H), 3.44\* (m, 1 H), 3.61-3.72 (m, 1 H), 3.79 (m, 1 H), 4.15\* (t,  $J$  = 6.9 Hz, 1 H), 4.21 (t,  $J$  = 6.9 Hz, 1 H), 4.25-4.33\* (m, 2 H), 4.35 (dd,  $J$  = 10.6 Hz and 6.9 Hz, 1 H), 4.42 (dd,  $J$  = 10.6 Hz and 6.9 Hz, 1 H), 4.50\* (br t,  $J$  = 6.9 Hz, 1 H), 4.65 (dd,  $J$  = 8.9 Hz and 4.8 Hz, 1 H), 4.69 (s, 2 H), 4.77\* (d,  $J$  = 17.2 Hz, 1 H), 4.90\* (d,  $J$  = 17.2 Hz, 1 H), 7.10 (t,  $J$  = 7.3 Hz, 1 H), 7.20 (t,  $J$  = 7.6 Hz, 1 H), 7.27-7.32 (m, 2 H), 7.35-7.41 (m, 3 H), 7.49\* (d,  $J$  = 7.9 Hz, 1 H), 7.57 (d,  $J$  = 8.1 Hz, 1 H), 7.62-7.68 (m, 2 H), 7.78 (d,  $J$  = 7.5 Hz, 2 H).

<sup>13</sup>C NMR (150 Mz, CD<sub>3</sub>OD):  $\delta$  = 23.0\*, 24.1, 28.8\*\*, 30.5, 30.6\*, 32.7, 33.0\*, 34.4, 41.0, 40.9\*, 44.3\*, 44.7, 48.4\*, 48.5, 49.8, 52.4\*, 52.5, 52.7\*, 67.9\*\*, 79.8\*, 79.9, 120.9, 125.6\* (q,  $^1J_{CF}$  = 271.2 Hz), 125.7 (q,  $^1J_{CF}$  = 270.9 Hz), 126.2, 126.3\*, 126.5 (q,  $^3J_{CF}$  = 3.3 Hz), 126.8\* (q,  $^3J_{CF}$  = 3.5 Hz), 128.2\*\*, 128.8, 129.1, 130.5\* (q,  $^2J_{CF}$  = 32.3 Hz), 130.9 (q,  $^2J_{CF}$  = 32.1 Hz), 142.6, 143.0\*, 143.3, 145.3, 145.2, 145.1\*, 158.4, 158.5\*, 158.6, 174.6, 174.9\*, 175.3.

Starting from **S2d** (11.94 g; 47.8 mmol) the ester intermediate **S3d** (30.78 g; 92%) was obtained, and an aliquot of this (14.82 g; 21.2 mmol) was converted into Fmoc-Lys(Boc)- $\beta$ NMephe-OH (**S4d**; 9.18 g; 67%). Analyt. UHPLC:  $t_R$  = 5.88 min (50%  $\rightarrow$  100% B in 10 min; purity: 99.3%).

$^1\text{H}$  NMR (600 MHz),  $\text{CD}_3\text{OD}$ ):  $\delta$  = 1.20-1.55 (m, 4 H), 1.40 (s, 9H), 1.41\* (s, 9 H), 1.60 (m, 2 H), 1.70\* (m, 2 H), 2.26 (s, 3 H), 2.27\* (s, 3 H), 2.47 (m, 1 H), 2.56-2.65 (m, 1 H), 2.71\* (m, 1 H), 2.90-3.08 (m, 2 H), 3.50 (m, 1 H), 3.55-3.64 (m, 1H), 3.70\* (m, 1 H), 4.15 (t,  $J$  = 6.8 Hz, 1 H), 4.20\* (t,  $J$  = 6.8 Hz, 1 H), 4.29-4.35 (m, 2 H), 4.39\* (m, 1 H), 4.51\*1 (d,  $J$  = 14.9 Hz, 1 H), 4.57 (t,  $J$  = 6.8 Hz, 1H), 4.59-4.65 (m, 2 H), 4.74 (d,  $J$  = 16.6 Hz, 1 H), 7.07-7.22 (m, 4 H), 7.27-7.32 (m, 2 H), 7.36-7.40 (m, 2 H), 7.63-7.68 (m, 2 H), 7.78 (d,  $J$  = 7.4 Hz, 2 H).

$^{13}\text{C}$  NMR (150 Mz,  $\text{CD}_3\text{OD}$ ):  $\delta$  = 21.1 \*\*, 24.0, 24.1\*, 28.8, 30.5, 30.6\*, 33.0, 34.2, 32.9\*, 41.0 \*\*, 44.0\*, 44.2, 48.4 \*\*, 49.5\*, 52.5\*, 52.6, 52.7, 67.9, 68.0\*, 79.9, 120.9, 126.2\*, 126.3, 128.1, 128.2\*, 128.6\*, 128.8, 128.9, 130.3, 130.5\*, 135.1, 135.5\*, 138.3\*, 138.6, 142.6, 145.3, 145.2\*, 158.4, 158.5, 174.6, 174.8, 174.9\*, 175.3\*.

#### *General procedures for synthesis of peptidomimetics and peptide*

The novel  $\alpha$ -peptide/ $\beta$ -peptoid peptidomimetics **F2M2-F2M10** and **F2M12-F2M18** were synthesized on a Rink amide resin (loading, 0.5-0.7 mmol/g; 0.05-0.1 mmol scale) in Teflon reactors (10 mL) by standard Fmoc solid-phase synthesis using the appropriate dimeric building blocks. Fmoc deprotection was performed with 20% piperidine in DMF (2  $\times$  10 min, each time with 5 mL; shaking at room temperature). After each Fmoc deprotection and coupling the resin was washed with DMF, MeOH, and DCM (each 3  $\times$  3 min with 5 mL). Coupling of building blocks was performed with PyBOP–DIPEA 1:2 in DMF (2-3 mL DMF; PyBOP: 2.0 equiv for loading, 2.5 equiv for the first two elongations, and 3.0 equiv for subsequent elongations; >2 h under shaking at room temperature). Capping was applied after coupling no. 4 with  $\text{Ac}_2\text{O}$ –DIPEA–NMP 1:2:3 (5 mL, 10 min at room temperature). After the final Fmoc deprotection the N-terminus was acetylated (conditions as for capping) or acylated via coupling of the corresponding acid (5 equiv, 16 h; Fmoc-Aoc-OH, octanoic acid, decanoic acid, or myristic acid) using PyBOP (5 equiv) as coupling reagent, or via coupling with the N-hydroxysuccinimidyl esters (5 equiv, 16 h; Lau-OSu and Pam-OSu; 5 equiv DIPEA). Following cleavage from the resin with TFA–water 95:5 (5 mL, 1 h at room temperature) all peptidomimetics were purified by preparative HPLC. The identity of the compounds was verified by HRMS ( $\Delta\text{M}$  < 10 ppm), and the purity was determined by analytical HPLC (> 95% at 220 nm). After lyophilization target compounds were stored at  $-20$  °C until use.

Peptide **F2M11** was synthesized on a CEM Liberty microwave peptide synthesizer by using Fmoc-based solid-phase peptide synthesis on a Rink Amide AM resin (0.48 mmol/g, 0.1 mmol, 208 mg). Chain elongation was performed by using 0.2 M  $N^t$ -Fmoc-protected and side chain protected amino acid building blocks (Fmoc-Lys(Boc)-OH and Fmoc-Phe-OH; 5.0 equiv) in DMF in combination with 0.5 M HBTU (5.0 equiv) as coupling reagent and 2 M DIPEA (4.9 Equiv) in NMP as activator base. Fmoc deprotection was performed with 20% piperidine in DMF. Amino acid couplings were conducted at 75°C (25 W for 900 sec), while Fmoc deprotections were conducted at 75°C (37 W for 30 sec followed by 40 W for 180 sec).

*Peptidomimetic F2M2*. Analytical HPLC (20% → 100% B during 30 min):  $t_R = 18.98$  min (purity: 98.2%). HRMS: calcd for  $[M + 3H]^{3+}$  693.1367, found 693.1367;  $\Delta M = 0.0$  ppm.

*Peptidomimetic F2M3*. Analytical HPLC (20% → 100% B during 30 min):  $t_R = 16.55$  min (purity: 97.5%). HRMS: calcd for  $[M + 3H]^{3+}$  674.4491, found 674.4485 ;  $\Delta M = 0.8$  ppm.

*Peptidomimetic F2M4*. Analytical HPLC (20% → 100% B during 30 min):  $t_R = 17.88$  min (purity: 98.2%). HRMS: calcd for  $[M + 3H]^{3+}$  683.7929, found 683.7949 ;  $\Delta M = 2.9$  ppm.

*Peptidomimetic F2M5*. Analytical HPLC (20% → 100% B during 30 min):  $t_R = 20.65$  min (purity: 98.6%). HRMS: calcd for  $[M + 3H]^{3+}$  702.4804, found 702.4796 ;  $\Delta M = 1.5$  ppm.

*Peptidomimetic F2M6*. Analytical HPLC (20% → 100% B during 30 min):  $t_R = 22.11$  min (purity: 97.2%). HRMS: calcd for  $[M + 3H]^{3+}$  711.8242, found 711.8241;  $\Delta M = 0.1$  ppm.

*Peptidomimetic F2M7*. Analytical HPLC (20% → 100% B during 30 min):  $t_R = 18.02$  min (purity: 97.8%). HRMS: calcd for  $[M + 3H]^{3+}$  683.7929, found 683.7949 ;  $\Delta M = 2.9$  ppm.

*Peptidomimetic F2M8*. Analytical HPLC (20% → 100% B during 30 min):  $t_R = 20.32$  min (purity: 97.0%). HRMS: calcd for  $[M + 3H]^{3+}$  702.4804, found 702.4815 ;  $\Delta M = 1.5$  ppm.

*Peptidomimetic F2M9*. Analytical HPLC (20% → 100% B during 30 min):  $t_R = 21.82$  min (purity: 98.7%). HRMS: calcd for  $[M + 3H]^+$  711.8242, found 711.8247;  $\Delta M = 0.7$  ppm.

*Peptidomimetic F2M10*. Analytical HPLC (20% → 100% B during 30 min):  $t_R = 18.98$  min (purity: 98.3%). HRMS: calcd for  $[M + 3H]^{3+}$  693.1367, found 693.1356 ;  $\Delta M = 1.5$  ppm.

*Peptide F2M11*. Analytical HPLC (20% → 100% B during 30 min):  $t_R = 19.30$  min (purity: 97.1%). HRMS: calcd for  $[M + 3H]^{3+}$  665.1054, found 665.1034 ;  $\Delta M = 3.0$  ppm.

*Peptidomimetic F2M12*. Analytical HPLC (20% → 100% B during 30 min):  $t_R = 21.77$  min (purity: 98.8%). HRMS: calcd for  $[M + 3H]^{3+}$  801.0801, found 801.0835 ;  $\Delta M = 4.2$  ppm.

*Peptidomimetic F2M13*. Analytical HPLC (20% → 100% B during 30 min):  $t_R = 19.75$  min (purity: 97.7%). HRMS: calcd for  $[M + 3H]^{3+}$  729.1178, found 729.1210 ;  $\Delta M = 4.3$  ppm.

*Peptidomimetic F2M14*. Analytical HPLC (20% → 100% B during 30 min):  $t_R = 20.61$  min (purity: 97.8%). HRMS: calcd for  $[M + 3H]^{3+}$  721.1678, found 721.1668 ;  $\Delta M = 1.3$  ppm.

*Peptidomimetic F2M15*. Analytical HPLC (20% → 100% B during 30 min):  $t_R = 15.68$  min (purity: 98.1%). HRMS: calcd for  $[M + 3H]^{3+}$  693.4563, found 693.4551 ;  $\Delta M = 1.7$  ppm.

*Peptidomimetic F2M16*. Analytical HPLC (20% → 100% B during 30 min):  $t_R = 13.80$  min (purity: 98.5%). HRMS: calcd for  $[M + 3H]^{3+}$  646.4178, found 646.4169 ;  $\Delta M = 1.3$  ppm.

*Peptidomimetic F2M17*. Analytical HPLC (20% → 100% B during 30 min):  $t_R = 16.67$  min (purity: 98.5%). HRMS: calcd for  $[M + 3H]^{3+}$  646.0982, found 646.0964 ;  $\Delta M = 2.7$  ppm.
